# Supplementary material for: A versatile ultrafine and super-absorptive H+-modified montmorillonite: application for metabolic syndrome intervention and gastric mucosal protection
Source: Royal Society of Chemistry journal article supplement (doi:10.1039/d0bm00474j), 2020-01-01
Supplement: d0bm00474j1.pdf [file d0bm00474j1.pdf]

## Supporting Information

### **A versatile ultrafine and super-absorptive H<sup>+</sup>-modified montmorillonite: application for metabolic syndrome intervention and gastric mucosal protection**

*Qiwen Wang*<sup>‡a, b</sup>, *Jie Shen*<sup>‡c</sup>, *Enqi Mo*<sup>b</sup>, *Haotian Zhang*<sup>d</sup>, *Jianwei Wang*<sup>b</sup>, *Xiurong Hu*<sup>b</sup>, *Jun Zhou*<sup>b</sup>, *Hongzhen Bai*<sup>b, \*</sup>, *Guping Tang*<sup>b, \*</sup>

*<sup>a</sup> Department of Cardiology, The First Affiliated Hospital, School of Medicine, Zhejiang University, Hangzhou 310003, P. R. China*

*<sup>b</sup> Department of Chemistry, Zhejiang University, Hangzhou 310028, P. R. China*

*<sup>c</sup> School of Medicine, Zhejiang University City College, Hangzhou 310015, P. R. China*

*<sup>d</sup> School of Medicine, Zhejiang University, Hangzhou 310058, P. R. China*

*<sup>‡</sup> Both authors contributed equally to this work*

*\* To whom correspondence should be addressed:*

*Hongzhen Bai: hongzhen\_bai@zju.edu.cn,*

*Guping Tang: tangguping@zju.edu.cn.*

### **Electronic Supplementary Information (2 pages)**

- |                                                                 |    |
|-----------------------------------------------------------------|----|
| 1. FT-IR spectra                                                | S2 |
| 2. Sections from hamsters treated with high dose of simvastatin | S3 |

1. FT-IR spectra

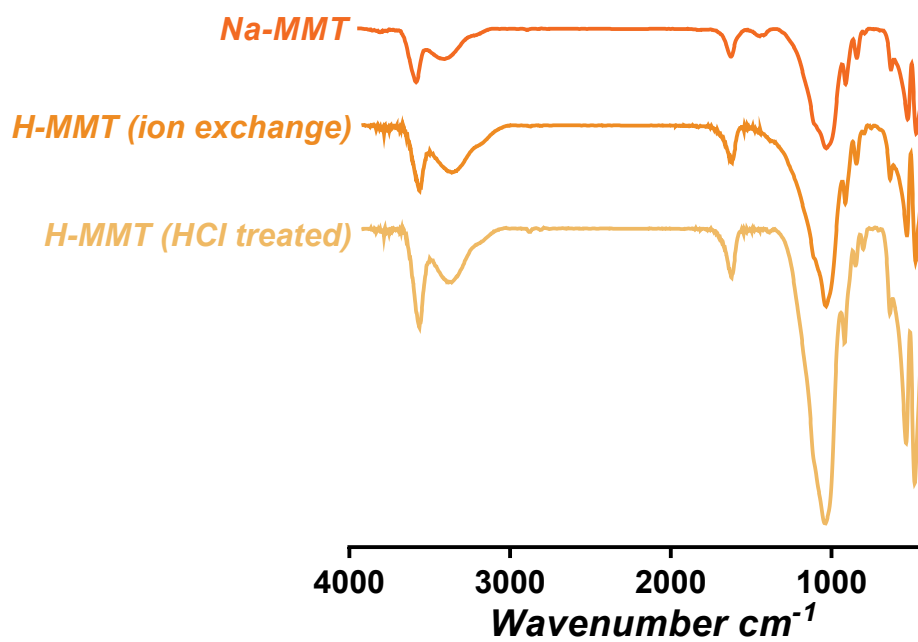

**Figure S1** FT-IR spectra of Na-MMT, H-MMT (ion exchange) and H-MMT (HCl treated).

**2. Sections from hamsters treated with high dose of simvastatin**

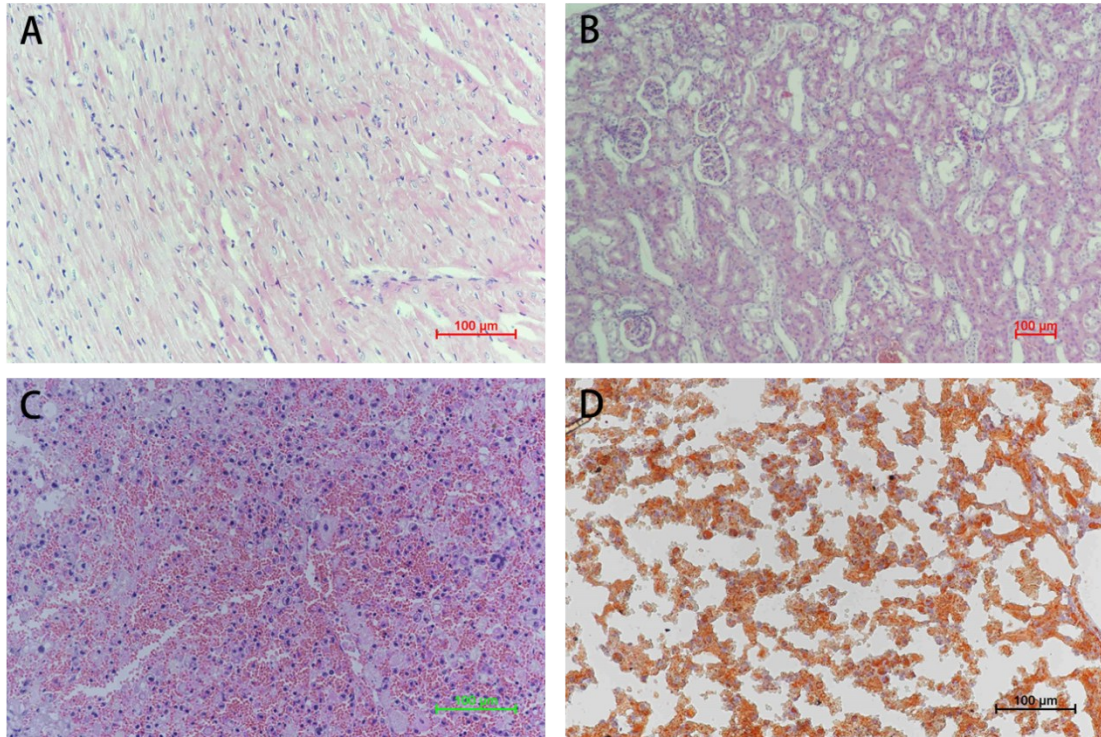

**Figure S2** H&E staining of heart (A), kidney (B), liver (C) sections and oil red O staining of liver (D) sections from hamsters treated with high dose of simvastatin (10 mg/kg).

**3. Intestinal tract sections from hamsters treated with different formulations**

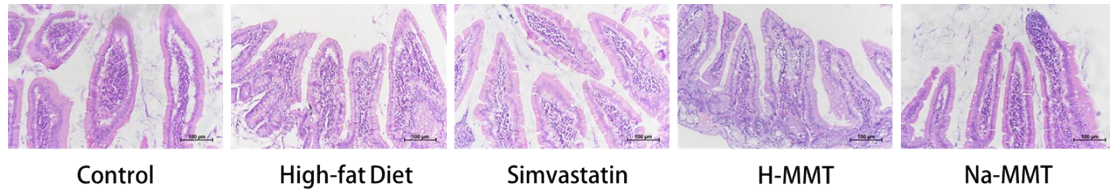

**Figure S3** H&E staining of intestinal tract sections from hamsters treated with normal diet (control), high-fat diet, high-fat diet with simvastatin, high-fat diet with H-MMT and high-fat diet with Na-MMT, respectively.
